# **An enveloped virus-like particle vaccine expressing a stabilized prefusion form of the SARS-CoV-2 spike protein elicits potent immunity after a single dose.**

3

4 Anne-Catherine Fluckiger<sup>1\*#</sup>, Barthelemy Ontsouka<sup>2#</sup>, Jasminka Bozic<sup>2</sup>, Abebaw Diress<sup>2</sup>,  
5 Tanvir Ahmed<sup>2</sup>, Tamara Berthoud<sup>2</sup>, Anh Tran<sup>4</sup>, Diane Duque<sup>4</sup>, Mingmin Liao<sup>5</sup>; Michael  
6 McCluskie<sup>4</sup>, Francisco Diaz-Mitoma<sup>3</sup>, David E. Anderson<sup>3</sup>, Catalina Soare<sup>2</sup>

7

8 <sup>1</sup>Bionaria, 11Bis Rue de la Garenne, 69290 Saint-Genis-les-Ollières, France; <sup>2</sup>VBI  
9 Vaccines, 201-310 Hunt Club Road, Ottawa ON K1V 1C1, Canada; <sup>3</sup>VBI Vaccines,  
10 Cambridge, 222 Third Street, Cambridge, 02142 Massachusetts, USA; <sup>4</sup>National Research  
11 Council Canada, Department of Human Health Therapeutics, 100 Sussex Drive, Ottawa  
12 ON K1A0R6, Canada; <sup>5</sup>Vaccine and Infectious Disease Organization-International Vaccine  
13 Centre, University of Saskatchewan, 120 Veterinary Road, Saskatoon, Saskatchewan S7N  
14 5E3 Canada.

15

16 # These authors contributed equally to this work.

17 \*Corresponding author:

18 Email: [afluckiger@vbivaccines.com](mailto:afluckiger@vbivaccines.com)

19

## **Highlights**

- 21 ● VBI-2902a is a VLP-based vaccine candidate against SARS-COV-2
- 22 ● VBI-2902a contains VLPs pseudotyped with a modified prefusion SARS-COV-2 S in Alum.
- 23 ● VBI-2902a induces robust neutralization antibody response against SARS-COV-2 S
- 24 ● VBI-2902a protects hamsters from SARS-CoV-2 induced lung inflammation
- 25 ● A single dose of VBI-2902a provides protective benefit in hamsters

26

27

1

28

## 29 **Abstract**

30 Development of efficacious single dose vaccines would substantially aid efforts to stop the  
 31 uncontrolled spread of the COVID-19 pandemic. We evaluated enveloped virus-like particles  
 32 (eVLPs) expressing various forms of the SARS-CoV-2 spike protein and several adjuvants in an  
 33 effort to identify a COVID-19 vaccine candidate efficacious after a single dose. The eVLPs  
 34 expressing a modified prefusion form of SARS-CoV-2 spike protein were selected as they induced  
 35 the highest antibody binding titers and neutralizing activity after a single injection in mice.  
 36 Formulation of SARS-CoV-2 S eVLPs with aluminum phosphate resulted in balanced induction of  
 37 IgG2 and IgG1 isotypes and antibody binding and neutralization titers were undiminished for more  
 38 than 3 months after a single immunization. A single dose of this candidate, VBI-2902a (prefusion S  
 39 eVLPs formulated with aluminum phosphate), protected Syrian golden hamsters from challenge  
 40 with SARS-CoV-2 and supports the on-going clinical evaluation of VBI-2902a as a potential single  
 41 dose vaccine against COVID-19.

42

## 43 **Keywords**

44 SARS-COV-2; Vaccine; Virus-like-particles; Immunogenicity; Neutralizing antibodies

45

## 46 **Abbreviations**

47 eVLP, enveloped virus-like particules; CoV, coronavirus; RBD, receptor binding domain; TMCTD,  
 48 transmembrane cytoplasmic terminal domain; Ab, antibody; nAb, neutralizing antibody; MLV,  
 49 murine leukemia virus; ELISA, enzyme-linked-immuno-sorbent-assay; PRNT, plaque reduction  
 50 neutralization test; EPT, end-point titer; Alum, aluminum; ELISPOT, Enzyme Linked ImmunoSpot  
 51 Test; IP, IntraPeritoneal; IM, IntraMuscular; NRC, National Research Council Canada; VIDO,  
 52 Vaccine and Infectious Disease Organization

53

## 54 **1. Introduction**

55 SARS-CoV-2 has been circulating worldwide for more than a year with no significant sign of natural  
56 exhaustion, in contrast to the previous SARS and MERS epidemics in 2003 and 2012 respectively,  
57 which faded despite absence of a vaccine or specific antiviral treatments. In contrast to the SARS  
58 epidemic, the COVID-19 pandemic is associated with increasing morbidity, mortality, and  
59 mutagenic potential as more people are infected at an increasing rate [1]. The possibility of waning  
60 immunity and isolated cases of re-infection after a period of convalescence have been reported  
61 that have prompted questions about correlates of protection and the efficacy of natural immunity  
62 [2-4]. Unprecedented efforts and measures have been undertaken to rapidly provide prophylactic  
63 vaccines that could decrease the rate of infection and prevent severe health complications.

64 The SARS-CoV-2 spike (S) protein was identified as a major target for neutralizing antibodies  
65 (nAb) due to its crucial role in mediating virus entry and its homology to S proteins from SARS,  
66 MERS and other coronaviruses (CoV) for which nAb had similarly been demonstrated [5,6]. CoV S  
67 proteins resemble typical of class I viral proteins. They are constituted of 2 functional subunits, S1,  
68 containing the receptor binding domain (RBD) and S2, containing the fusion entry domain. Binding  
69 of the RBD to the host cell receptor induces conformational changes resulting in activation of the  
70 protease cleavage site upstream of the fusion domain followed by release and activation of the S2  
71 fusogenic domain [7]. Unlike SARS-CoV and other CoV from the same clade, SARS-CoV-2 S  
72 contains a furin cleavage site located at the boundary of S1 and S2 [6,8](Walls, Cell 2020:  
73 Coutard, Antiviral Res. 2020) enabling rapid processing of the S protein during biosynthesis in  
74 host cells.

75 The CoV S proteins are expressed at the viral surface as metastable prefusion trimers that  
76 undergo conformational changes [6-7]. Studies of class I viral fusion proteins resulted in the design  
77 of stabilized prefusion forms resistant to protease cleavage that could increase expression yield  
78 and elicit potent neutralization responses in mice [9-10]. Wrapp et al. [11] described a similar  
79 strategy whereby 2 consecutive prolines in the S2 subdomain between heptad repeat 1 and the  
80 central helix are substituted with the addition of a C-terminus foldon trimerization domain. The  
81 result was a SARS-COV-2 stabilized S-2P antigen. Vaccine candidates containing SARS-CoV-2 S-

2P have demonstrated potent induction of nAb responses in laboratory animals [12-13] and humans [14-15].

Virus-like particles (VLPs) are attractive vaccine candidates to generate nAb responses. Structurally, they resemble the wild-type virus from which they are derived, but are much safer because they lack genetic material and therefore the ability to replicate [16]. VLPs enable repeating, array-like presentation of antigens which is a preferred means of activating B cells and eliciting high affinity antibodies [17]. Indeed, VLP expression of a B cell antigen improved neutralizing titers over 10-fold relative to immunization with the same amount of recombinant protein [18]. Accordingly, the use of VLPs as a vaccine modality may expand higher affinity B cell repertoires relative to recombinant protein or DNA/mRNA-based modalities.

In the present study murine leukemia virus (MLV)-based enveloped virus-like particles (eVLPs) [18,19] were used to produce vaccine candidates expressing various forms of SARS-CoV-2 S. We demonstrate that a modified prefusion form of S containing the ectodomain of SARS-CoV-2 S fused with the transmembrane cytoplasmic terminal domain of VSV-G enabled high yields and density of S expression on MLV-Gag eVLPs and induced robust nAb responses exceeding those observed with SARS-CoV-2 convalescent sera after a single dose when adjuvanted with Alum phosphate (VBI-2902a). This candidate, VBI-2902a, was safe and highly efficacious in a hamster challenge model and offers the potential for use as a single dose vaccine. More generally, these data demonstrate the high potency of antigen expression by eVLPs.

101

## 102 **2. Materials and Methods**

103

### 104 *2.1. COVID-19 human sera*

105

Plasma samples were purchased from Biomex GmbH (Heidelberg, Germany). Samples were collected under consent at donation centers in Heildelberg or Munich, from 30 individual who recovered from moderate SARS-CoV-2 infection with no need for hospitalization or heavy treatment. Subjects were aged 26 to 61 years old. Sera were collected at 26 to 72 days post time

110 of infection. One 61 years old woman was asymptomatic but all others experienced multiples  
111 symptoms including fever, headache, anosmia, coughing, difficulty to breath, tiredness and muscle  
112 pain.

113

## 114 *2.2. Plasmids, eVLPs production and adjuvant formulation*

115

116 All sequences coding for the full length and modified S proteins from SARS-CoV-2 were codon  
117 optimized prior to synthesis and subcloned into a proprietary modified phCMV plasmid at Genscript  
118 (Piscataway, NJ). The proprietary HEK293SF-3F6 GMP compliant cells were provided by the  
119 National Research Council (NRC, Montreal, Canada) and grown in serum-free chemically defined  
120 medium [20]. eVLPs were produced using transient polyethylenimine transfection in 293SF-3F6 by  
121 co-transfection of one plasmid coding for the spike protein with a phCMV plasmid encoding  
122 minimal cDNA sequence of murine leukemia virus (MLV) Gag corresponding to the full length Gag  
123 deprived of its C-terminal Polymerase sequence as described elsewhere [18]. Control called  
124 “empty” eVLPs or Gag eVLPs were produced by exclusive transfection of the Gag plasmid. Cell  
125 culture harvests containing eVLPs were processed using a proprietary purification steps that  
126 consists of clarification, tangential flow filtration, benzonase® treatment, diafiltration and  
127 ultracentrifugation using sucrose cushion. The final product was sterile filtered using 0.2 µm  
128 membrane prior to preparation of vaccine. Depending on the different pre-clinical mouse studies,  
129 SARS-CoV-2 eVLPs vaccines were formulated with different adjuvant system including Alum  
130 (Adjuphos®), AS03, MF59, and AS04. Adjuvants AS03, AS04 and its VBI modified version,  
131 Addavax™ (MF59), 2% AdjuPhos® (aluminium phosphate referred as Alum) were purchased from  
132 Invivogen.

133

## 134 *2.3. Western blot analysis of eVLPs content*

135

136 The expression of SARS-CoV-2 S protein in eVLP preparations was analyzed by western blotting  
137 as described previously [18] using rabbit polyclonal Ab (pAb) anti-spike protein of SARS-CoV-2

(Immune Technology Corp) followed by detection with goat anti-rabbit IgG-Fc horseradish peroxidase-conjugated (Bethyl). Alternatively, human sera from COVID-19 convalescent subjects was used as primary antibody followed by detection with goat anti-human IgG heavy and light chain HRP-conjugated (Bethyl). Precision Protein Streptactin HRP conjugate (Bio-Rad) was used as molecular weight ladder standard. Recombinant SARS-COV-2 S(S1+S2) unmodified protein (Mybiosource) or SARS-CoV-2 stabilized prefusion S protein (National Research Council of Canada - NRC) were used as controls.

150

#### 151 *2.4. Mouse immunization study*

152

153 Six- to 8-week-old female C57BL/6 mice were purchased from Jackson Laboratory (ME, USA) .  
154 The animals were allowed to acclimatize for a period of at least 7 days before any procedures were  
155 performed. The animal studies were conducted under ethics protocols approved by the National  
156 Research Council of Canada Animal Care Committee. The animals were maintained in a controlled  
157 environment in accordance with the “Guide for the Care and Use of Laboratory Animals” at the  
158 NRC Animal Research facility (Institute for Biological Sciences, Ottawa, Canada). Mice were  
159 randomly assigned to experimental groups and received intraperitoneal (IP) injections with 0.5 mL  
160 of different adjuvanted SARS-CoV-2 immunogens. Blood was collected on day -1 (pretreatment)  
161 and day 14 after each injection. All mice from each group were sacrificed 14 days after the last  
162 immunization for humoral immunity assessment and or 6 days after the second immunity, where  
163 spleens were collected for cellular immunity assessment.

164

#### 165 *2.5. Hamster challenge study*

166

167 Syrian golden hamsters (males, 5-6 weeks old) were purchased from Charles River Laboratories  
168 (Saint-Constant, Quebec, Canada). The study was conducted under approval of the CCAC  
169 committee at the Vaccine and Infectious Disease Organization (VIDO) International Vaccine Centre  
170 (Saskatchewan, Canada). Animals were randomly assigned to each experimental groups (A, B)

(n=12/group) in two independent experiments (Regimen II and Regimen I). Groups A placebo received 0.9%-saline buffer, Groups B received VBI-2902a. Each dose of VBI-2902a contained 1 µg of SPG and 125 µg of Alum. Injection was performed by intramuscular (IM) route at one side of the thighs in a 100 µL volume. The schedule for immunization, challenge and sample collection was depicted on Fig. 6a. All animals were challenged intranasally via both nares with 50 µL/nare containing  $1 \times 10^5$  TCID<sub>50</sub> of SARS-CoV-2/Canada/ON/VIDO-01/2020/Vero'76 (Seq. available at GISAID EPI\_ISL\_413015) strain per animal. Body weights and body temperature were measured at immunization for 3 days and daily from the challenge day. General health conditions were observed daily through the entire study period. Blood samples and nasal washes were collected as indicated on Fig. 6a. Half of the animals (6/group) were euthanized at 3 days post-infection (dpi), and the remaining animals were euthanized at 14 dpi. The challenge experiments were performed in the animal biosafety level 3 (ABSL3) laboratory at VIDO (Saskatchewan, Canada).

183

## 184 2.6. Antibody binding titers

185

186 Anti-SARS-CoV-2 specific IgG binding titers in mouse sera were measured by standard ELISA procedure described elsewhere [18], using recombinant SARS-CoV-2 S (S1+S2) protein (Sinobiological). For total IgG binding titers, detection was performed using a goat anti-mouse IgG-Fc HRP (Bethyl) for mouse serum, or goat anti-human IgG heavy and light chain HRP-conjugated (Bethyl) for human serum. HRP-conjugated Goat anti-mouse IgG1 and HRP-conjugated goat anti-mouse IgG2b HRP (Bethyl) were used for the detection of isotype subtype. Determination of Ab binding titers to the RBD was performed using SARS-COV-2 RDB recombinant protein (Sinobiological). Detection was completed by adding 3,3',5,5'-tetramethylbenzidine (TMB) substrate solution, and the reaction stopped by adding liquid stop solution for TMB substrate. Absorbance was read at 450 nm in an ELISA microwell plate reader. Data fitting and analysis were performed with SoftMaxPro 5, using a four-parameter fitting algorithm.

197 Ab binding titers in hamster sera were determined with ELISA method. Plates were coated with spike S1+S2 Ag (Sinobiological). The coating concentration was 0.1 ug/mL. Plates were blocked



with 5% non-fat skim milk powder in PBS containing 0.05% Tween 20. Fourfold dilutions of serum were used. Goat anti-Hamster IgG HRP from ThermoFisher (PA1-29626) was used as the secondary antibody at 1:7000. Plates were developed with OPD peroxidase substrate (0.5 mg/ml) (Thermo Scientific Pierce). The reaction was stopped with 2.5 M sulfuric acid and absorbance was measured at 490 nm. Throughout the assay, plates were washed with PBS containing 0.05% Tween 20. The assay was performed in duplicate. The titres were reported as the end point of the dilutions.

## 2.7. Virus neutralization assays

Neutralizing activity in mouse serum samples was measured by standard plaque reduction neutralization test (PRNT) on Vero cells at the NRC (Ottawa, Canada) using 100 PFU of SARS-CoV-2/Canada/ON/VIDO-01/2020. Results were represented as PRNT90, PRNT80, or PRNT50 end point titer, corresponding to the lowest dilution inhibiting respectively 90% or 80% or 50% of plaque formation in Vero cell culture.

Virus neutralization assays against the challenge SARS-CoV-2 virus were performed at VIDO, Saskatchewan on the hamster serum samples collected at pre-challenge and at the end day; 3 days post-challenge or 14 days post-challenge. The study was conducted using the cell line Vero E6. The serum samples were heat-inactivated for 30 min at 56°C. The serum samples were initially diluted 1:10 and then serially diluted (2-fold serial dilutions). The virus was diluted in medium for a final concentration of  $3 \times 10^2$  TCID<sub>50</sub>/mL. Initially 60 µL of the virus solution was mixed with 60 µL serially diluted serum samples. The mixture was incubated for 1hr at 37°C, with 5% CO<sub>2</sub>. The pre-incubated virus-serum mixtures (100 µL/well) were transferred to the wells of the 96-well flat-bottom plates containing 90% confluent pre-seeded VeroE6 cells. The plates were incubated at 37°C, with 5% CO<sub>2</sub> for 5 days. The plates were observed using a microscope on day 1 post-infection for contamination and on days 3 and 5 post-infection for cytopathic effect (CPE). The serum dilution factor for the last well with no CPE at 5 dpi was defined as the serum neutralization titer. The initial serum dilution factor was 1:20.



227

## 228 *2.8. RNA extraction and purification*

229

230 RNA was extracted using QIAamp Viral RNA Mini Kit (Qiagen). Briefly, 140 µL of hamster nasal  
231 wash was added into 560 µL viral lysis buffer (Buffer AVL). The mixture was incubated at room  
232 temperature for 10 min. After brief centrifugation, the solution was transferred to a fresh tube  
233 containing 600 µL of 100% ethanol, and the tube was incubated at room temperature for 10 min.  
234 RNA was then purified using QiaAmp Viral RNA Mini Kit and eluted with 60 µL of RNase Free  
235 water containing 0.04% sodium azide (elution buffer AVE). Extraction of RNA from lung lobes and  
236 nasal turbinates was completed using approximately 100 µg of tissue. The tissues were  
237 homogenized in 600 µL of lysis buffer (RLT Qiagen) with a sterile stainless steel bead in the  
238 TissueLyserII (Qiagen) for 6 min, at 30 Hz. The solution was centrifuged at 5000 x g for 5 min.  
239 Supernatant was transferred to a fresh tube containing 600 µL of 70% ethanol, and the tube was  
240 incubated at room temperature for 10 min. Viral RNA was then purified using Qiagen Rneasy Mini  
241 Kit (Cat No /ID: 74106) and eluted with 50 µL elution buffer.

242

## 243 *2.9. Viral qRT-PCR reaction*

244

245 The qRT-PCR assays were performed on RNA from samples of nasal washes, lung tissues and  
246 nasal turbinates using SARS-CoV-2 specific primers targeting the E gene (Fwd, ACAGGTACGT-  
247 TAATAGTTAATAGCGT; Rev, ATATTGCAGCAGTACGCACACA) and labelled probe, AACTA-  
248 GCCATCCTTACTGCGCTTCG. The primers have an annealing temperature of approximately  
249 60°C. Qiagen Quantifast RT-PCR Probe kits were used for qRT-PCR. The qRT-PCR results were  
250 expressed in RNA copy number per reaction. This was done by producing a standard curve with  
251 RNA extracted from a sample of SARS-CoV-2 which was cloned to determine exact copy number  
252 of the gene of interest. The Ct values for individual samples were used with the standard curve to  
253 determine the copy number in each sample. The qRT-PCR reactions were performed using the  
254 OneStepPlus (Applied Biosystems) machine. The program was set at: Reverse transcription (RT)

255 10 min at 50°C; Inactivation 5 min at 95°C; and then 40 cycles of denaturation for 10 sec at 95°C  
256 and annealing/extension for 30 sec at 60°C.

257

## 258 2.10. *IFN-γ Ex-vivo ELISPOT*

259

260 IFN-γ ELISPOT analyses to measure Th1 T cell responses were performed as follows. One day  
261 before the spleens were removed, ELISpot plates (Millipore) were coated with IFN-γ capture  
262 antibody at a concentration of 15 µg/mL (Mabtech). The following day, mice were sacrificed and  
263 spleens were removed. Spleens from individual mice were processed to produce single cell  
264 suspensions. Erythrocytes were lysed using a commercially available RBC lysis buffer  
265 (BioLegend). Fifty microliters containing  $2 \times 10^6$  splenocytes were then to each well of a pre-blocked  
266 ELISPOT plate. Then, fifty microliters of stimulant pepmixes (JPT peptides) resuspended in  
267 RPMI+10%FBS (R10) with recombinant mouse IL-2 (rmIL-2) (R&D Systems) were added to each  
268 well. The final concentration of each peptide in the assay was 1µg/mL/peptide, and the final  
269 concentration of rmIL-2 was 0.1 ng/mL. R10 alone was used as a negative control and  
270 PMA+Ionomycin as a positive control. The ELISPOT plates were then placed into a humid 37°C  
271 with 5% CO2 incubator for 40-48 hours. After incubation, the plates were washed and IFN-γ  
272 capture antibody was added, followed by streptomycin horseradish peroxidase (strep-HRP). The  
273 plates were developed with commercially available 3-Amino-9-ethylcarbazole (AEC) substrate  
274 (Sigma-Aldrich). The observed spots were counted using an ELISPOT plate reader by ZellNet and  
275 the final data was reported as spot forming cells (SFC) per one million splenocytes.

276

## 277 2.11. *Histopathology*

278

279 At necropsy the left lung of hamsters was perfused with neutral-buffered formalin immediately after  
280 collection. Tissues were fixed in neutral-buffered formalin for a week, then placed into fresh  
281 neutral-buffered formalin before being transferred from containment level 3 to containment level 2

laboratory. Tissues were embedded, sectioned and stained with hematoxylin and eosin. Slides were examined by a board-certified pathologist.

## 2.12. Statistics

All statistical analyses were performed using GraphPad Prism 9 software (La Jolla, CA). Unless indicated, multiple comparison was done with Kruskal-Wallis test. The data were considered significant if  $p < 0.05$ . Geometric means with standard deviation are represented on graphs. No samples or animals were excluded from the analysis. Randomization was performed for the animal studies.

## 3. Results

### 3.1. Impact of SARS-CoV-2 S antigen design on expression and yield

Four constructs were designed based on the spike protein sequence of the SARS-CoV-2 Wuhan-Hu1 isolate and subcloned into expression plasmids for the production of eVLPs as described in Methods (Fig. 1a). To obtain a stabilized prefusion form of S (SP), the furin cleavage site of S, RRAR, was inhibited by mutation of the 3 arginines into a glycine and 2 serine (GSAS) and 2 proline substitutions were introduced at successive residues K986 and V987. Our previous work has demonstrated that the swap of the transmembrane cytoplasmic terminal domain (TMCTD) of CMV gB resulted in enhanced yields and immunogenicity of the gB glycoprotein presented on eVLPs [18]. Based on this data, two additional constructs, Native-VSVg (SG) and Stabilized Prefusion-VSVg (SPG) were designed by swapping the TMCTD of S with that of VSV-G. Western blot analysis of eVLPs using a polyclonal Ab directed against the SARS-CoV-2 S receptor binding domain confirmed the processing of SARS-CoV-2 S during biosynthesis in HEK-293 cells as expected by the presence of the furin cleavage site in S1/S2 [6]

(Fig. 1b, lane 2-3). Expression of S was slightly improved by the VSV-G swap in SG, and more dramatically enhanced by the inhibition of the cleavage sites in SP and SPG (Fig. 1b, lane 4-5). Overexpression of S in the prefusion forms showed a major band at 180 kDa, the size commonly described for uncleaved S180 kDa and an additional band around 150 kDa. The additional band around 150 kDa is reproducibly seen upon overexpression of uncleaved S, and most likely represents the S protein deprived of N-Glycosylation [21] that would occur because of overloading of the host cell machinery. Similar results were obtained after blotting with human convalescent sera.

Quantitative analysis of protein content in eVLP preparations showed that for a similar number of particles and comparable amounts of Gag protein, the amount of SARS-CoV-2 S protein was increased substantially with replacement of the TMCTD and by use of the stabilized prefusion construct, suggesting that the density of the S protein was enhanced using the VSV-G constructs (Table 1). The best yield was reproducibly obtained when producing the eVLPs expressing the prefusion-VSV-G form of S, with up to a 40-fold increase relative to eVLPs expressing native S.

### 3.2. Impact of SARS-CoV-2 S antigen design on neutralizing antibody responses

Comparison to convalescent serum is commonly used as a benchmark to help evaluate immunogenicity and potential efficacy of Covid-19 candidate vaccines. However, a wide spectrum of Ab responses can be observed in recovering patients, ranging from barely detectable to very high levels, likely influenced by time since infection and severity of disease. To enable comparison across experiments, we obtained a cohort of 20 sera from COVID-19 confirmed convalescent patients with moderate COVID-19 symptoms who all recovered without specific treatment intervention or hospitalization. The cohort was separated into two groups of 10 samples according to high or low levels of Ab binding activity to recombinant SARS-CoV-2 S (Fig. 2a). Sera from each group were then pooled and tested for neutralizing activity (Fig. 2b). As expected, the pool of human sera showing higher levels of IgG titers against SARS-CoV-2 S had the highest neutralizing activity, which was consistent with previous observations [22]. To provide a robust benchmark with

337 which to assess the immunogenicity of the vaccine candidates, only the high titer pooled sera was  
338 used to assess vaccine-induced responses in animals.

339 Humoral responses of the various types of SARS-CoV-2 eVLPs were evaluated in C57BL/6 mice  
340 that received 2 intraperitoneal injections at 3 week intervals (Fig. 3). The first injection of  
341 unmodified S presented on eVLPs induced levels of anti-SARS-CoV-2 S Ab binding titers similar to  
342 those in mice that received a recombinant trimerized prefusion S protein, but they were not  
343 associated with significant (90% or greater) neutralization activity as measured in a plaque  
344 reduction neutralization test (PRNT) (Fig. 3a-b). In contrast, a significant nAb response was  
345 induced by a single injection of eVLPs expressing prefusion SP or SPG, with PRNT90 end-point  
346 titers (EPTs) of 80 and 160 respectively. These values were higher than those observed with the  
347 human convalescent control pool (PRNT90 EPT of 50). All nAb responses were greatly enhanced  
348 by the second injection and reflected the responses that were observed prior to the boosting dose.  
349 Notably, all forms of SARS-CoV-2 S presented on eVLPs induced higher antibody titers than  
350 recombinant prefusion S protein, both in the levels of total IgG and neutralization activity, after one  
351 or two injections.

352 Individual mice sera obtained 14 days after the second injection of eVLPs were evaluated for the  
353 specificity of the Ab responses against the whole S1+S2 protein or the RBD (Fig. 3c-d). All  
354 immunized mice that received eVLPs showed robust anti-SARS-CoV-2 Ab responses either  
355 against a full length S1+S2 protein (Fig. 3c) or against the RBD protein (Fig. 3d). A more  
356 homogenous response was observed in mice that received the SPG eVLPs, with all Ab EPTs  
357 above 400,000 against S (5.6 Log 10), and above 650,000 against RBD (5.8 Log10).

358

### 359 *3.3 Influence of adjuvants on antibody and T cell responses*

360

361 A Th2-type response has been suggested to contribute to the “cytokine storm” associated with  
362 vaccine-induced severe lung pathologies [23,24]. In light of these results, we tested a variety of  
363 adjuvants that might enhance neutralizing Ab production while also promoting a balanced Th1/Th2  
364 response. For this purpose, we compared formulation of eVLPs with Alum against a panel of

adjuvants including MF59 and the adjuvant systems AS03 and AS04. We used SARS-CoV-2 native S eVLPs as they were less immunogenic than eVLPs expressing the prefusion form of the S protein and might better enable differences in the adjuvants to be observed. The various adjuvanted formulation of S eVLPs were compared to recombinant stabilized prefusion S protein (r-SP) formulated in Alum adjuvant, which was expected to induce a Th2-biased response [25]. Mice received two IP injections and Ab and T cell responses were measured 14 days after the second injection (Fig. 4). MF59 enhanced IFN- $\gamma$  T cell responses compared to Alum (Fig. 4a) but induced similar Ab responses (Fig. 4b, c) and a comparable, balanced IgG2/IgG1 ratio (Fig. 4d). The AS03 and AS04 adjuvants also skewed responses towards a Th1-type T cell response. Most remarkably, while r-SP in Alum preferentially induced IgG1 Ab representative of a Th2 response, S-eVLPs induced balanced production of IgG1 and IgG2b indicating a balanced Th1/Th2 response (Fig. 4d).

377

### 3.4. Immunogenicity in mice of vaccine candidate VBI-2902a

379

Based on the results described above, we chose to evaluate the immunogenicity and potential efficacy of eVLPs expressing SPG protein formulated with Alum, named VBI-2902a, after one or two injections 21 days apart. Fourteen days after a single injection, sera from mouse immunized with VBI-2902a contained total anti-Spike IgG EPTs reaching geometric means of (4.8 Log 10) 54,891 that were associated with neutralizing PRNT90 titers of 365 (2.6 Log10). A second injection boosted Ab binding titers to 228,374 (5.4 Log10) with nAb titers of 1,079 (3.0 Log10) (Fig. 5a-b). Levels of nAb response were higher than those observed in sera from convalescent patients. Abs were preferentially directed against the RBD and S1 with only low binding to S2 (Fig. 5c). Mouse splenocytes collected 2 weeks after each immunization were stimulated *ex vivo* using two different peptide pools preferentially covering the S1 domain (pepmix 1) or the S2 domain (pepmix 2) respectively. Numbers of IFN- $\gamma$  spot forming cells (Fig. 5d) suggested preferential T cell responses against the S1 domain of the spike protein rather than against the S2 domain. No major increases in T cell responses were observed after the second injection of VBI-2902a.

393 Additionally, we observed that a single dose of VBI-2902a induced a sustained Ab response for at  
394 least 15 weeks without any drop in neutralization titers (Fig. 5e).

395

### 396 *3.5. Protective efficacy of VBI-2902a in Syrian Golden Hamsters*

397

398 The protective efficacy of VBI-2902a was examined in Syrian Gold hamsters. SARS-CoV-2  
399 infection in Syrian Gold hamsters resembles features found in humans with moderate COVID-19  
400 and is characterized by a rapid weight loss starting 2 days post infection (dpi) [26,27]. Two  
401 immunization regimens were compared. Regimen II consisted of two IM injections of VBI-2902a or  
402 saline at 3 weeks interval whereas Regimen I consisted of a single dose injection of VBI-2902a or  
403 saline (Fig. 6a). Three weeks after the last injection (day 42 in Regimen II and day 21 in Regimen  
404 I), all animals were inoculated intranasally with  $1 \times 10^5$  TCID<sub>50</sub> of SARS-CoV-2 per animal and  
405 monitored daily for weight change, general health and behavior.

406 After a single injection of VBI-2902a the levels of anti-S IgG rapidly increased in the serum of  
407 immunized animals with EPTs reaching  $1-2 \times 10^3$  (Fig. 6b). The second injection enhanced these  
408 levels approximately 10-fold to reach EPTs of  $2-3 \times 10^4$  at day 35, which translated into robust  
409 neutralization titers of over  $10^3$  EPT as measured by PRNT<sub>90</sub> (Fig. 6c). In the single dose  
410 regimen, the neutralization activity (GeoMean 69), was increased 250-fold to 1725 within 3 days  
411 after exposure to the virus.

412 Animals in all groups lost 2-4% of body weight 2 days post infection (2dpi). Animals in the saline  
413 control groups continued to lost weight until an average 15% loss at 7dpi, before gradually  
414 regaining weight (Fig. 7a-b). In marked contrast, none of the hamsters immunized with two doses  
415 of VBI-2902a lost any further weight after 2dpi, regaining normal weight by 7dpi, demonstrating  
416 robust protection against SARS-CoV-2 disease. In the single dose regimen, the majority of the  
417 animals regained body weight after 3dpi instead of 2dpi, suggesting slightly delayed but significant  
418 protection against disease.

419 At 3dpi, hamsters vaccinated with either one or two doses of VBI-2902a had greatly decreased  
420 viral RNA copy numbers in lungs (Fig. 8a). Two doses of VBI-2902a resulted in a 5 Log decrease



in viral load in the cranial lobe and a 4 Log decrease in the caudal lobe relative to non-immunized animals; a single dose of vaccine induced a 2 Log decrease in the cranial lobe and a 4 Log decrease in the caudal lobe. The viral load values observed in lungs were inversely correlated with the neutralization measured as PRNT90 (Fig. c-d). More viral RNA was found in nasal turbinates, which may have included residual viral inoculum as suggested previously [27,28]. Data from prior studies also suggested an extended persistence of the virus in nasal turbinates while barely detectable in the lung [26]. Both vaccine regimens protected against the development of lung pathology as indicated by reductions of the lung to body weight ratio (Fig. 9a-b) and histological analysis of the lungs (Fig. 9c-d).

#### 4. Discussion

The unprecedented urgency for a safe COVID-19 vaccine that can confer protection as quickly as possible with as few doses as possible is evident as regulatory agencies and vaccine manufactures have discussed the risks and benefits of delaying planned second doses of currently available COVID-19 vaccines to enable immunization of a greater number of individuals as quickly as possible [29,30]. We have previously demonstrated that expression of proteins on the surface of eVLPs dramatically enriches for neutralizing antibody, the presumed correlate of protection against SARS-CoV-2, relative to recombinant proteins [18]. Accordingly, we evaluated both conformations of the SARS-CoV-2 S protein as well as a variety of adjuvants in an effort to identify a COVID-19 vaccine candidate with the potential to confer protection after a single dose.

The eVLPs particles were pseudotyped with SARS-CoV-2 unmodified S protein but expressed low amounts of S that were not suitable for upscaled production. We therefore designed a modified prefusion form of S that resulted in both dramatic increases in yields and enhancement of the nAb response compared to native S. SPG eVLPs induced high titers of RBD Ab binding titers associated with robust neutralizing responses in mice at levels that were much higher than those observed with a recombinant prefusion S protein. Indeed, 14 days after a single dose of SPG eVLPs formulated with aluminum phosphate nAb titers exceeded those associated with high titer

COVID-19 coalescent sera, persisted and were undiminished for at least 3 months. The potency observed after a single dose of VBI-2902a appears superior to what has been observed after 2 doses in the same strain of mice with an mRNA vaccine that has received Emergency Use Authorization [12], further demonstrating the strong potency of this vaccine candidate. In a hamster challenge model VBI-2902a demonstrated robust efficacy against clinical disease and lung inflammation. While two doses showed greater efficacy, a single dose clearly conferred protective benefit.

The value of eVLP expression of the modified SP protein is consistent with prior reports which demonstrated that an anchored version of a stabilized prefusion S antigen provided optimal induction of protective nAbs in Rhesus macaques [13]. Our construct differed from the previously described S-2P [13, 31] by using the VSV-G transmembrane cytoplasmic domain to replace that of S, instead of a C-terminal T4 fibritin trimerization domain. Based on previous experience and published data [18,19] , we hypothesized that the use of VSV-G tail and expression in the phospholipid membrane of eVLPs would result in natural trimerization of the spike ectodomains providing optimal presentation of neutralization epitopes. The use of the VSV-G tail has been shown to enhance expression and localization of viral glycoproteins at the phospholipid envelop of the particles [32,33].

Aluminum salt adjuvants have a long history of safety and are a component of approved VLP-based vaccines such as Gardasil® against HPV [34] and Engerix B® against HBV [35]. Nevertheless, theoretical concerns have been raised about the use of an aluminum-based adjuvant with a SARS-CoV-2 vaccine and the potential for Th2-mediated enhanced lung pathology [36,37]. Subsequent studies have demonstrated that non-neutralizing antibodies against structural proteins were responsible for the pathology observed in preclinical models [38]. Use of eVLP presentation of an optimized form of the SARS-CoV-2 S protein resulted in a highly potent and focused neutralizing antibody response which avoided any evidence of disease enhancement or increased lung inflammation. In a hamster challenge model VBI-2902a demonstrated efficacy and ability to suppress lung inflammation. While two doses showed better potency, the single dose also conferred protective benefit indicated by comparable results in terms of lung inflammation.

Moreover, compared to a clear Th2-biased profile observed in response to recombinant prefusion stabilized S protein in Alum, the similar prefusion S construct induced a balanced Th1/Th2 response when presented by eVLPs (Fig. 4d). The balanced production of IgG2/IgG1 antibody isotypes after VBI-2902a immunization was comparable with those described in response to the recently emergency use authorized vaccine Ad26.COV2.S [25]. These results emphasize an important difference in the quality of the antibody response when immunizing with soluble, recombinant versus particulate forms of vaccine antigens.

The VBI-2902a vaccine candidate addresses several issues that have thus far hindered the speed and extent of vaccination with currently available COVID-19 vaccines. This includes the need to administer multiple doses and the need for storage, transport, and distribution of the vaccine at freezing temperatures not typically required for prophylactic vaccines. VBI-2902a received approval from Health Canada to initiate its ongoing Phase I/II clinical study (NCT04773665) to assess its potential for one dose immunogenicity and potential efficacy.

490

## 491 **Acknowledgment**

The authors want to thank Adam Asselin, Matthew Yorke, Teresa Daoud, Lanjian (Isabel) Yang, Rebecca Wang, Gillian Lampkin (VBI vaccines) for outstanding technical support; Traian Sulea (NRC) for discussions on construct design, NRC Animal Resources Group and the VIDO Saskatchewan team for remarkable care with animal experiments as well as Ammon Ding and Echo Wu (Genescript) for their dedication in plasmid preparation. All the people cited above contributed to the success of the study by the excellence of their work.

498

**Funding** VBI-2902a study was supported by Government of Canada Innovation, Science and Industry (ISED) funding through the Strategic Innovation Fund (SIF).

501

## 502 **References**

503 [1] WHO weekly reports,

504 <https://www.who.int/emergencies/diseases/novel-coronavirus-2019/situation-reports>

- [2] To KK, Hung IF, Ip JD, Chu AW, Chan WM, Tam AR, Fong CH, Yuan S, Tsoi HW, Ng AC, Lee LL, Wan P, Tso E, To WK, Tsang D, Chan KH, Huang JD, Kok KH, Cheng VC, Yuen KY. COVID-19 re-infection by a phylogenetically distinct SARS-coronavirus-2 strain confirmed by whole genome sequencing. Clin Infect Dis. 2020 Aug 25;ciaa1275. doi: 10.1093/cid/ciaa1275. Epub ahead of print. PMID: 32840608; PMCID: PMC7499500.
- [3] Tillett RL, Sevinsky JR, Hartley PD, Kerwin H, Crawford N, Gorzalski A, Laverdure C, Verma SC, Rossetto CC, Jackson D, Farrell MJ, Van Hooser S, Pandori M. Genomic evidence for reinfection with SARS-CoV-2: a case study. Lancet Infect Dis. 2021 Jan;21(1):52-58. doi: 10.1016/S1473-3099(20)30764-7. Epub 2020 Oct 12. PMID: 33058797; PMCID: PMC7550103.
- [4] Lavine JS, Bjornstad ON, Antia R. Immunological characteristics govern the transition of COVID-19 to endemicity. Science. 2021 Jan 12:eabe6522. doi: 10.1126/science.abe6522. Epub ahead of print. PMID: 33436525.
- [5] Li F. Structure, Function, and Evolution of Coronavirus Spike Proteins. Annu Rev Virol. 2016 Sep 29;3(1):237-261. doi: 10.1146/annurev-virology-110615-042301. Epub 2016 Aug 25. PMID: 27578435; PMCID: PMC5457962.
- [6] Walls AC, Park YJ, Tortorici MA, Wall A, McGuire AT, Veasler D. Structure, Function, and Antigenicity of the SARS-CoV-2 Spike Glycoprotein. Cell. 2020 Apr 16;181(2):281-292.e6. doi: 10.1016/j.cell.2020.02.058. Epub 2020 Mar 9. Erratum in: Cell. 2020 Dec 10;183(6):1735. PMID: 32155444; PMCID: PMC7102599.
- [7] Walls AC, Tortorici MA, Snijder J, Xiong X, Bosch BJ, Rey FA, Veasler D. Tectonic conformational changes of a coronavirus spike glycoprotein promote membrane fusion. Proc Natl Acad Sci U S A. 2017 Oct 17;114(42):11157-11162. doi: 10.1073/pnas.1708727114. Epub 2017 Oct 3. PMID: 29073020; PMCID: PMC5651768.
- [8] Coutard B, Valle C, de Lamballerie X, Canard B, Seidah NG, Decroly E. The spike glycoprotein of the new coronavirus 2019-nCoV contains a furin-like cleavage site absent in CoV of the same clade. Antiviral Res. 2020 Apr;176:104742. doi:

- 10.1016/j.antiviral.2020.104742. Epub 2020 Feb 10. PMID: 32057769; PMCID: PMC7114094.
- [9] McLellan JS, Chen M, Leung S, Graepel KW, Du X, Yang Y, Zhou T, Baxa U, Yasuda E, Beaumont T, Kumar A, Modjarrad K, Zheng Z, Zhao M, Xia N, Kwong PD, Graham BS. Structure of RSV fusion glycoprotein trimer bound to a prefusion-specific neutralizing antibody. *Science*. 2013 May 31;340(6136):1113-7. doi: 10.1126/science.1234914. Epub 2013 Apr 25. PMID: 23618766; PMCID: PMC4459498. Pallesen J, Wang N, Corbett KS, Wrapp D, Kirchdoerfer RN, Turner HL, Cottrell CA, Becker MM, Wang L, Shi W, Kong WP, Andres EL, Kettenbach AN, Denison MR, Chappell JD, Graham BS, Ward AB, McLellan JS. Immunogenicity and structures of a rationally designed prefusion MERS-CoV spike antigen. *Proc Natl Acad Sci U S A*. 2017 Aug 29;114(35):E7348-E7357. doi: 10.1073/pnas.1707304114. Epub 2017 Aug 14. PMID: 28807998; PMCID: PMC5584442.
- [10] Wrapp D, Wang N, Corbett KS, Goldsmith JA, Hsieh CL, Abiona O, Graham BS, McLellan JS. Cryo-EM structure of the 2019-nCoV spike in the prefusion conformation. *Science*. 2020 Mar 13;367(6483):1260-1263. doi: 10.1126/science.abb2507. Epub 2020 Feb 19. PMID: 32075877; PMCID: PMC7164637.
- [11] Corbett KS, Edwards DK, Leist SR, Abiona OM, Boyoglu-Barnum S, Gillespie RA, Himansu S, Schäfer A, Ziwawo CT, DiPiazza AT, Dinno KH, Elbashir SM, Shaw CA, Woods A, Fritch EJ, Martinez DR, Bock KW, Minai M, Nagata BM, Hutchinson GB, Wu K, Henry C, Bahl K, Garcia-Dominguez D, Ma L, Renzi I, Kong WP, Schmidt SD, Wang L, Zhang Y, Phung E, Chang LA, Loomis RJ, Altaras NE, Narayanan E, Metkar M, Presnyak V, Liu C, Louder MK, Shi W, Leung K, Yang ES, West A, Gully KL, Stevens LJ, Wang N, Wrapp D, Doria-Rose NA, Stewart-Jones G, Bennett H, Alvarado GS, Nason MC, Ruckwardt TJ, McLellan JS, Denison MR, Chappell JD, Moore IN, Morabito KM, Mascola JR, Baric RS, Carfi A, Graham BS. SARS-CoV-2 mRNA vaccine design enabled by prototype pathogen preparedness. *Nature*. 2020 Oct;586(7830):567-571. doi: 10.1038/s41586-020-2622-0. Epub 2020 Aug 5. PMID: 32756549; PMCID: PMC7581537.

- [12] Mercado NB, Zahn R, Wegmann F, Loos C, Chandrashekar A, Yu J, Liu J, Peter L, McMahan K, Tostanoski LH, He X, Martinez DR, Rutten L, Bos R, van Manen D, Vellinga J, Custers J, Langedijk JP, Kwaks T, Bakkers MJG, Zuijdgeest D, Rosendahl Huber SK, Atyeo C, Fischinger S, Burke JS, Feldman J, Hauser BM, Caradonna TM, Bondzie EA, Dagotto G, Gebre MS, Hoffman E, Jacob-Dolan C, Kirilova M, Li Z, Lin Z, Mahrokhian SH, Maxfield LF, Nampanya F, Nityanandam R, Nkolola JP, Patel S, Ventura JD, Verrington K, Wan H, Pessaint L, Van Ry A, Blade K, Strasbaugh A, Cabus M, Brown R, Cook A, Zouantchangadou S, Teow E, Andersen H, Lewis MG, Cai Y, Chen B, Schmidt AG, Reeves RK, Baric RS, Lauffenburger DA, Alter G, Stoffels P, Mammen M, Van Hoof J, Schuitemaker H, Barouch DH. Single-shot Ad26 vaccine protects against SARS-CoV-2 in rhesus macaques. *Nature*. 2020 Oct;586(7830):583-588. doi: 10.1038/s41586-020-2607-z. Epub 2020 Jul 30. PMID: 32731257; PMCID: PMC7581548.
- [13] Anderson EJ, Rouphael NG, Widge AT, Jackson LA, Roberts PC, Makhene M, Chappell JD, Denison MR, Stevens LJ, Pruijssers AJ, McDermott AB, Flach B, Lin BC, Doria-Rose NA, O'Dell S, Schmidt SD, Corbett KS, Swanson PA 2nd, Padilla M, Neuzil KM, Bennett H, Leav B, Makowski M, Albert J, Cross K, Edara VV, Floyd K, Suthar MS, Martinez DR, Baric R, Buchanan W, Luke CJ, Phadke VK, Rostad CA, Ledgerwood JE, Graham BS, Beigel JH; mRNA-1273 Study Group. Safety and Immunogenicity of SARS-CoV-2 mRNA-1273 Vaccine in Older Adults. *N Engl J Med*. 2020 Dec 17;383(25):2427-2438. doi: 10.1056/NEJMoa2028436. Epub 2020 Sep 29. PMID: 32991794; PMCID: PMC7556339.
- [14] Walsh EE, Frenck RW Jr, Falsey AR, Kitchin N, Absalon J, Gurtman A, Lockhart S, Neuzil K, Mulligan MJ, Bailey R, Swanson KA, Li P, Koury K, Kalina W, Cooper D, Fontes-Garfias C, Shi PY, Türeci Ö, Tompkins KR, Lyke KE, Raabe V, Dormitzer PR, Jansen KU, Şahin U, Gruber WC. Safety and Immunogenicity of Two RNA-Based Covid-19 Vaccine Candidates. *N Engl J Med*. 2020 Dec 17;383(25):2439-2450. doi: 10.1056/NEJMoa2027906. Epub 2020 Oct 14. PMID: 33053279; PMCID: PMC7583697.

- 585 [15] Roldão A, Mellado MC, Castilho LR, Carrondo MJ, Alves PM. Virus-like particles in  
586 vaccine development. *Expert Rev Vaccines*. 2010 Oct;9(10):1149-76. doi:  
587 10.1586/erv.10.115. PMID: 20923267.
- 588 [16] Bachmann MF, Rohrer UH, Kündig TM, Bürki K, Hengartner H, Zinkernagel RM. The  
589 influence of antigen organization on B cell responsiveness. *Science*. 1993 Nov  
590 26;262(5138):1448-51. doi: 10.1126/science.8248784. PMID: 8248784.
- 591 [17] Kirchmeier M, Fluckiger AC, Soare C, Bozic J, Ontsouka B, Ahmed T, Diress A,  
592 Pereira L, Schödel F, Plotkin S, Dalba C, Klatzmann D, Anderson DE. Enveloped virus-like  
593 particle expression of human cytomegalovirus glycoprotein B antigen induces antibodies  
594 with potent and broad neutralizing activity. *Clin Vaccine Immunol*. 2014 Feb;21(2):174-80.  
595 doi: 10.1128/CVI.00662-13. Epub 2013 Dec 11. PMID: 24334684; PMCID: PMC3910943.
- 596 [18] Garrone P, Fluckiger AC, Mangeot PE, Gauthier E, Dupeyrot-Lacas P, Mancip J,  
597 Cangialosi A, Du Chéné I, LeGrand R, Mangeot I, Lavillette D, Bellier B, Cosset FL, Tangy  
598 F, Klatzmann D, Dalba C. A prime-boost strategy using virus-like particles pseudotyped for  
599 HCV proteins triggers broadly neutralizing antibodies in macaques. *Sci Transl Med*. 2011  
600 Aug 3;3(94):94ra71. doi: 10.1126/scitranslmed.3002330. PMID: 21813755.
- 601 [19] Sun Z, Ren K, Zhang X, Chen J, Jiang Z, Jiang J, Ji F, Ouyang X, Li L. Mass  
602 Spectrometry Analysis of Newly Emerging Coronavirus HCoV-19 Spike Protein and Human  
603 ACE2 Reveals Camouflaging Glycans and Unique Post-Translational Modifications.  
604 *Engineering (Beijing)*. 2020 Aug 30. doi: 10.1016/j.eng.2020.07.014. Epub ahead of print.  
605 PMID: 32904601; PMCID: PMC7456593.
- 606 [20] Ni L, Ye F, Cheng ML, Feng Y, Deng YQ, Zhao H, Wei P, Ge J, Gou M, Li X, Sun L,  
607 Cao T, Wang P, Zhou C, Zhang R, Liang P, Guo H, Wang X, Qin CF, Chen F, Dong C.  
608 Detection of SARS-CoV-2-Specific Humoral and Cellular Immunity in COVID-19  
609 Convalescent Individuals. *Immunity*. 2020 Jun 16;52(6):971-977.e3. doi:  
610 10.1016/j.immuni.2020.04.023. Epub 2020 May 3. PMID: 32413330; PMCID:  
611 PMC7196424.



- 612 [21] Peeples L. News Feature: Avoiding pitfalls in the pursuit of a COVID-19 vaccine.  
613 Proc Natl Acad Sci U S A. 2020 Apr 14;117(15):8218-8221. doi: 10.1073/pnas.2005456117.  
614 Epub 2020 Mar 30. PMID: 32229574; PMCID: PMC7165470.
- 615 [22] Roncati L, Nasillo V, Lusenti B, Riva G. Signals of  $T_H2$  immune response from  
616 COVID-19 patients requiring intensive care. Ann Hematol. 2020 Jun;99(6):1419-1420. doi:  
617 10.1007/s00277-020-04066-7. Epub 2020 May 8. PMID: 32382776; PMCID: PMC7205481.
- 618 [23] Bos R, Rutten L, van der Lubbe JEM, Bakkers MJG, Hardenberg G, Wegmann F,  
619 Zuijdgeest D, de Wilde AH, Koornneef A, Verwilligen A, van Manen D, Kwaks T, Vogels R,  
620 Dalebout TJ, Myeni SK, Kikkert M, Snijder EJ, Li Z, Barouch DH, Vellinga J, Langedijk JPM,  
621 Zahn RC, Custers J, Schuitemaker H. Ad26 vector-based COVID-19 vaccine encoding a  
622 prefusion-stabilized SARS-CoV-2 Spike immunogen induces potent humoral and cellular  
623 immune responses. NPJ Vaccines. 2020 Sep 28;5:91. doi: 10.1038/s41541-020-00243-x.  
624 PMID: 33083026; PMCID: PMC7522255.
- 625 [24] Chan JF, Zhang AJ, Yuan S, Poon VK, Chan CC, Lee AC, Chan WM, Fan Z, Tsoi  
626 HW, Wen L, Liang R, Cao J, Chen Y, Tang K, Luo C, Cai JP, Kok KH, Chu H, Chan KH,  
627 Sridhar S, Chen Z, Chen H, To KK, Yuen KY. Simulation of the Clinical and Pathological  
628 Manifestations of Coronavirus Disease 2019 (COVID-19) in a Golden Syrian Hamster  
629 Model: Implications for Disease Pathogenesis and Transmissibility. Clin Infect Dis. 2020  
630 Dec 3;71(9):2428-2446. doi: 10.1093/cid/ciaa325. PMID: 32215622; PMCID: PMC7184405.
- 631 [25] Sia SF, Yan LM, Chin AWH, Fung K, Choy KT, Wong AYL, Kaewpreedee P, Perera  
632 RAPM, Poon LLM, Nicholls JM, Peiris M, Yen HL. Pathogenesis and transmission of SARS-  
633 CoV-2 in golden hamsters. Nature. 2020 Jul;583(7818):834-838. doi: 10.1038/s41586-020-  
634 2342-5. Epub 2020 May 14. PMID: 32408338; PMCID: PMC7394720.
- 635 [26] Roberts A, Vogel L, Guarner J, Hayes N, Murphy B, Zaki S, Subbarao K. Severe  
636 acute respiratory syndrome coronavirus infection of golden Syrian hamsters. J Virol. 2005  
637 Jan;79(1):503-11. doi: 10.1128/JVI.79.1.503-511.2005. PMID: 15596843; PMCID:  
638 PMC538722.

- 639 [27] WHO SAGE Interim recommendations for use of the Pfizer-BioNtech COVID-19  
640 vaccine, BNT162b2, under emergency use listing. WHO. 8 Jan 2021  
641 WHO/2019-nCoV/vaccines/SAGE\_recommendation/BNT162b2/2021.1
- 642 [28] FDA statement on following the authorized dosing schedules for COVID-19  
643 vaccines. January 2021. [https://www.fda.gov/news-events/press-announcements/fda-](https://www.fda.gov/news-events/press-announcements/fda-statement-following-authorized-dosing-schedules-covid-19-vaccines)  
644 [statement-following-authorized-dosing-schedules-covid-19-vaccines](https://www.fda.gov/news-events/press-announcements/fda-statement-following-authorized-dosing-schedules-covid-19-vaccines)
- 645 [29] Kuo TY, Lin MY, Coffman RL, Campbell JD, Traquina P, Lin YJ, Liu LT, Cheng J, Wu  
646 YC, Wu CC, Tang WH, Huang CG, Tsao KC, Chen C. Development of CpG-adjuvanted  
647 stable prefusion SARS-CoV-2 spike antigen as a subunit vaccine against COVID-19. *Sci*  
648 *Rep.* 2020 Nov 18;10(1):20085. doi: 10.1038/s41598-020-77077-z. PMID: 33208827;  
649 PMCID: PMC7676267.
- 650 [30] Schnell MJ, Buonocore L, Kretzschmar E, Johnson E, Rose JK. Foreign  
651 glycoproteins expressed from recombinant vesicular stomatitis viruses are incorporated  
652 efficiently into virus particles. *Proc Natl Acad Sci U S A.* 1996 Oct 15;93(21):11359-65. doi:  
653 10.1073/pnas.93.21.11359. PMID: 8876140; PMCID: PMC38062.
- 654 [31] Nègre D, Mangeot PE, Duisit G, Blanchard S, Vidalain PO, Leissner P, Winter AJ,  
655 Rabourdin-Combe C, Mehtali M, Moullier P, Darlix JL, Cosset FL. Characterization of novel  
656 safe lentiviral vectors derived from simian immunodeficiency virus (SIVmac251) that  
657 efficiently transduce mature human dendritic cells. *Gene Ther.* 2000 Oct;7(19):1613-23. doi:  
658 10.1038/sj.gt.3301292. PMID: 11083469.
- 659 [32] Muñoz N, Manalastas R Jr, Pitisuttithum P, Tresukosol D, Monsonego J, Ault K,  
660 Clavel C, Luna J, Myers E, Hood S, Bautista O, Bryan J, Taddeo FJ, Esser MT, Vuocolo S,  
661 Haupt RM, Barr E, Saah A. Safety, immunogenicity, and efficacy of quadrivalent human  
662 papillomavirus (types 6, 11, 16, 18) recombinant vaccine in women aged 24-45 years: a  
663 randomised, double-blind trial. *Lancet.* 2009 Jun 6;373(9679):1949-57. doi: 10.1016/S0140-  
664 6736(09)60691-7. Epub 2009 Jun 1. PMID: 19493565.

- [33] Keating GM, Noble S. Recombinant hepatitis B vaccine (Engerix-B): a review of its immunogenicity and protective efficacy against hepatitis B. *Drugs*. 2003;63(10):1021-51. doi: 10.2165/00003495-200363100-00006. PMID: 12699402.
- [34] Tseng CT, Sbrana E, Iwata-Yoshikawa N, Newman PC, Garron T, Atmar RL, Peters CJ, Couch RB. Immunization with SARS coronavirus vaccines leads to pulmonary immunopathology on challenge with the SARS virus. *PLoS One*. 2012;7(4):e35421. doi: 10.1371/journal.pone.0035421. Epub 2012 Apr 20. Erratum in: *PLoS One*. 2012;7(8). doi:10.1371/annotation/2965cfae-b77d-4014-8b7b-236e01a35492. PMID: 22536382; PMCID: PMC3335060.
- [35] Eichinger KM, Kosanovich JL, Gidwani SV, Zomback A, Lipp MA, Perkins TN, Oury TD, Petrovsky N, Marshall CP, Yondola MA, Empey KM. Prefusion RSV F Immunization Elicits Th2-Mediated Lung Pathology in Mice When Formulated With a Th2 (but Not a Th1/Th2-Balanced) Adjuvant Despite Complete Viral Protection. *Front Immunol*. 2020 Jul 29;11:1673. doi: 10.3389/fimmu.2020.01673. PMID: 32849580; PMCID: PMC7403488.
- [36] Yasui F, Kai C, Kitabatake M, Inoue S, Yoneda M, Yokochi S, Kase R, Sekiguchi S, Morita K, Hishima T, Suzuki H, Karamatsu K, Yasutomi Y, Shida H, Kidokoro M, Mizuno K, Matsushima K, Kohara M. Prior immunization with severe acute respiratory syndrome (SARS)-associated coronavirus (SARS-CoV) nucleocapsid protein causes severe pneumonia in mice infected with SARS-CoV. *J Immunol*. 2008 Nov 1;181(9):6337-48. doi: 10.4049/jimmunol.181.9.6337. PMID: 18941225.
- [37] Côté J, Garnier A, Massie B, Kamen A. Serum-free production of recombinant proteins and adenoviral vectors by 293SF-3F6 cells. *Biotechnol Bioeng*. 1998 Sep 5;59(5):567-75. PMID: 10099373.

## Legends to Figures

**Fig. 1: Constructs design and production of eVLPs expressing SARS-CoV-2 Spike protein.**

**(a)** Schematic representation of SARS-COV-2 S plasmid constructs. TM-CTD: Transmembrane cytoplasmic terminal domain. **(b)** Expression of SARS-CoV-2 S analyzed by Western-blot of SARS-CoV-2 eVLPs and recombinant proteins using a rabbit polyclonal Ab (pAb, upper panel) raised against SARS-CoV-2 RBD (Sinobiological) or COVID-19 convalescent human serum (HuCS, bottom panel). eVLPs produced with Gag plasmid only (Gag eVLPs) and recombinant SARS-CoV-2 S proteins were used as negative and positive controls respectively. r-S: recombinant native S, r-SP: recombinant prefusion S protein containing a mutated furin cleavage domain (RRAR → GSAS), replacement of 2 proline (KV → PP) and a trimerization domain.

**Fig. 2: Measure of anti-SARS-CoV-2 Ab in COVID-19 convalescent human plasma. (a)** Ab binding titers against SARS-CoV-2 S (S1+S2). Plasma samples were grouped according to initial screening by YHLO method in two groups Low and High Ab titers prior to be tested in the in-house ELISA against a recombinant S(S1+S2). **(b)** Neutralizing activity was measured by PRNT90 as described in Material and Methods. Results are represented as end point titers (EPT).

**Fig. 3: Immunogenicity of the various forms of SARS-CoV-2 S eVLPs in C57BL/6 mice.** Four groups of 10 C57BL/6 mice received 2 injections of various forms of SARS-CoV-2 S eVLPs or recombinant SP at day 0 and 21 as indicated on legend, S: native S, SG: S with VSV-G tail, SP: prefusion S, SPG: prefusion S with VSV-G tail, r-SP: recombinant SP protein. Sera were collected 2 weeks after each injection. **(a)** Pooled sera from each group were analyzed for specific SARS-CoV-2 S(S1+S2) total IgG; results are represented as EPT corresponding to the first dilution that gave an OD 3-fold above background. **(b)** Pooled sera from each group were analyzed in PRNT assay with a 90% threshold (PRNT90) as described in Material and Methods. A pool of human sera from COVID-19 convalescent patients with moderate disease (HuCS) was used as reference. **(c-d)** Individual sera were analyzed in ELISA using recombinant SARS-CoV-2 S(S1+S2) protein (c) or recombinant SARS-CoV-2 RBD protein (d). P values from Kruskal-Wallis test comparing groups are indicated in c and d.

720

721 **Fig. 4: Influence of various adjuvant in the SARS-CoV-2 S eVLPs-mediated Ab and T cell**  
 722 **response.** At day 0 and 21, five groups of 10 C57BL/6 mice received 2 injections of S eVLPs in the  
 723 presence of various adjuvants as indicated in legends and described in Material and Methods.  
 724 Sera and splenocytes were collected 2 weeks after the second injection. **(a)** Numbers of IFN $\gamma$   
 725 producing cells per million splenocytes collected 2 weeks after the second injection were measured  
 726 by ELISpot using peptide pool covering the entire S(S1+S2) protein. **(b)** Total IgG were measured  
 727 in ELISA against recombinant SARS-CoV-2 S(S1+S2) protein, results are represented as EPT. **(c-**  
 728 **d)** Isotype usage was determined in individual sera by specific ELISA using HRP conjugate goat  
 729 Ab against mouse IgG1 and IgG2. **(c)** Results are expressed as the ratio of IgG2b to IgG1. Results  
 730 from Kruskal-Wallis comparison of groups are indicated.

731

732 **Fig. 5: Immunogenicity of VBI-2902a and VBI-2902e in C57BL/6 mice. (a-d)** Two groups of 10  
 733 mice were immunized twice at 3 weeks interval with VBI-2902a or VBI-2902e containing 0.2  $\mu$ g of  
 734 S protein. Blood was collected 2 weeks after each injection, P1d: post 1<sup>st</sup> dose, P2d: post 2<sup>nd</sup> dose.  
 735 **(a)** Ab binding titer against recombinant S(S1+S2) compared to human convalescent sera,  
 736 measured by ELISA, **(b)** neutralization end point titers measured by PRNT90, **(c)** Ab binding titers  
 737 against recombinant S(S1+S2), recombinant RBD or recombinant S2 measured by ELISA in sera  
 738 after the 2<sup>nd</sup> dose. Results from Kruskal-Wallis comparison of groups are indicated for A and B. **(d)**  
 739 Numbers of IFN $\gamma$  producing cells per million splenocytes collected 2 weeks after each injection  
 740 were measured by ELISpot using Pepmix 1 or Pepmix 2 preferentially covering SARS-CoV-2 S1  
 741 domain or tS2 domain respectively. **(e)** Kinetic of the humoral response after single injection of  
 742 VBI-2902a calculated as end point titer determined in ELISA and PRNT90.

743

744 **Fig. 6: Immunogenicity of VBI-2902a or VBI-2902e in Syrian golden hamsters. (a)** Schematic  
 745 representation of the challenge experiments. Each challenge experiment used 2 groups of 15  
 746 Syrian golden hamsters. In regimen II, animals received 2 IM injections of VBI-2902a (2 $\mu$ g of S per  
 747 dose) or placebo saline buffer administered at 3 weeks interval. In regimen I, animals received a

single injection of VBI-2902a or Saline buffer. Blood was collected 2 weeks after each injection. Three weeks after the last injection corresponding to day 42 in regimen II and day 21 in regimen I, hamsters were exposed to SARS-CoV-2 at  $1 \times 10^5$  TCID<sub>50</sub> per animal via both nares. At 3 days post infection (dpi), 6 animals per groups were sacrificed for viral load analysis. The remaining animals were clinically evaluated daily until end of study at 14dpi. **(b)** Anti-SARS-CoV-2 S(S1+S2) total IgG EPT measured by ELISA 2 weeks after each immunization. **(c)** Neutralization activity was measured by PRNT90 in immunized groups; results are represented as PRNT90 EPT.

755

**Fig. 7: Weight change of hamsters after exposure to SARS-CoV-2.** Hamsters from experiment described in fig. 6 were monitored daily for weight change. Results are represented for each animal in each groups as kinetic of weight change from SARS-CoV-2 exposure to day 9 after infection. **(a)** represents the weight change observed in the 2-dose regimen (II), **(b)** represent the weight change observed in the single dose regimen (I).

761

**Fig. 8: Viral load analysis in SARS-CoV-2 infected hamsters. (a-b)** At 3dpi, qRT-PCR assays were performed on RNA from samples of nasal washes, lung tissues (cranial and caudal lobes) using SARS-CoV-2 specific primers. Results were expressed as copy number per gram of tissue sample. **(c-d)** Correlation analysis of viral loads measured in lung caudal lobe and PRNT90.

766

**Fig. 9: Clinical evaluation of lung pathology in immunized hamsters challenged by SARS-CoV-2 virus. (a-b)** lung to body weight ratio in hamsters at 3dpi and 14dpi. **(c-d)** Histopathology severity analysis of hamster lungs at 3dp and 14 dpi. Scores were evaluated on a scale from 0 to 4 as follow: 0, no microscopic lesions; 1, slight or questionable pneumonia; 2, clearly present, but not conspicuously so; 3, moderate pneumonia; 4, severe pneumonia. Statistics were performed using Kruskal-Wallis non-parametric test followed by Dunn' multiple comparisons test. Adjusted p values are shown.

774 **Table 1**

775

776

777 **Table 1: Optimisation of SARS-CoV-2 S protein yields by alteration of the sequence construct**

| <b>Spike Construct</b>       | <b>Gag total amount (mg)</b> | <b>SARS-CoV-2 S total amount (mg)</b> | <b>S to Gag ratio (%)</b> | <b>Particle number /mL</b> |
|------------------------------|------------------------------|---------------------------------------|---------------------------|----------------------------|
| <b>Native (S)</b>            | 23                           | 0.16                                  | 0.07                      | 4.37x10 <sup>11</sup>      |
| <b>Native-VSV-G (SG)</b>     | 19                           | 0.5                                   | 0.26                      | 4.37x10 <sup>11</sup>      |
| <b>Prefusion (SP)</b>        | 32                           | 0.23                                  | 0.71                      | 4.37x10 <sup>11</sup>      |
| <b>Prefusion-VSV-G (SPG)</b> | 23                           | 0.64                                  | 2.78                      | 4.37x10 <sup>11</sup>      |

778



779 **FIGURE 1**

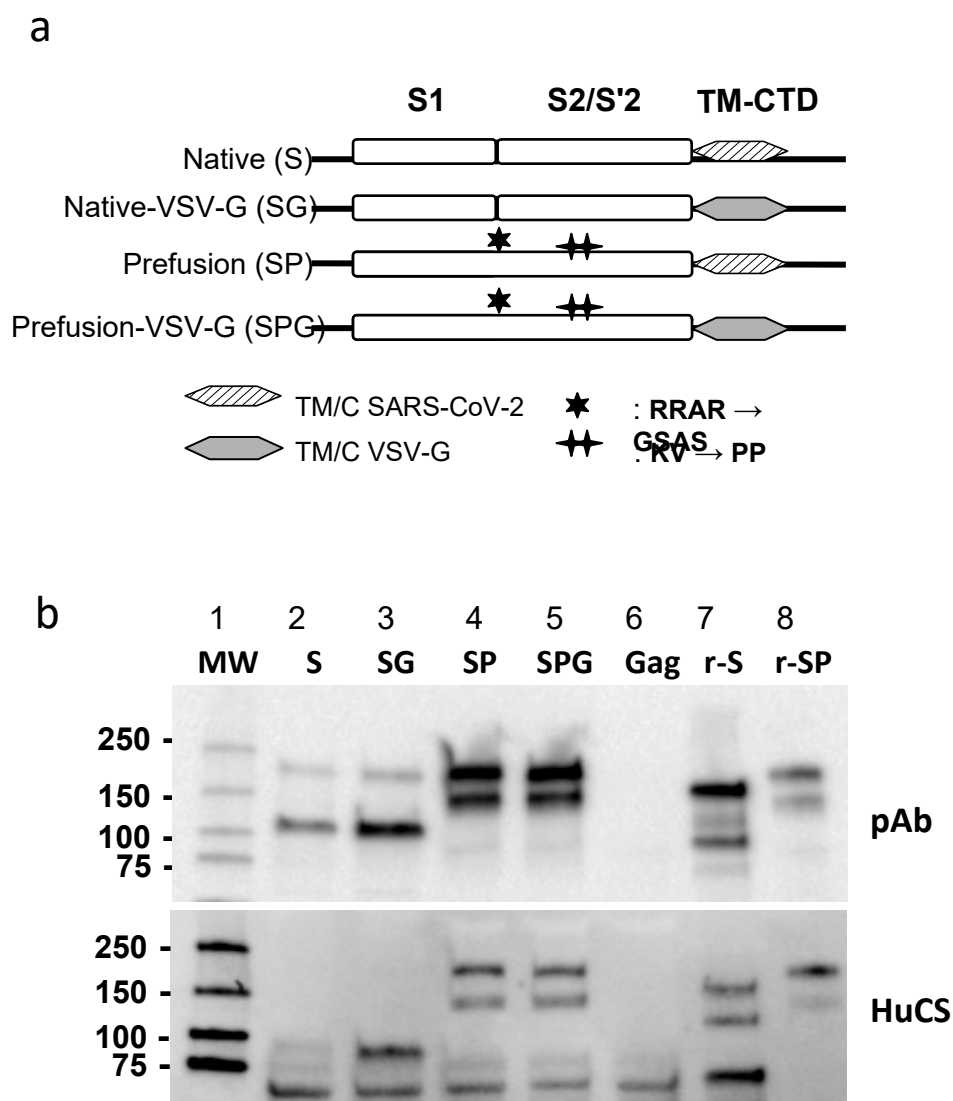

780 FIGURE 2

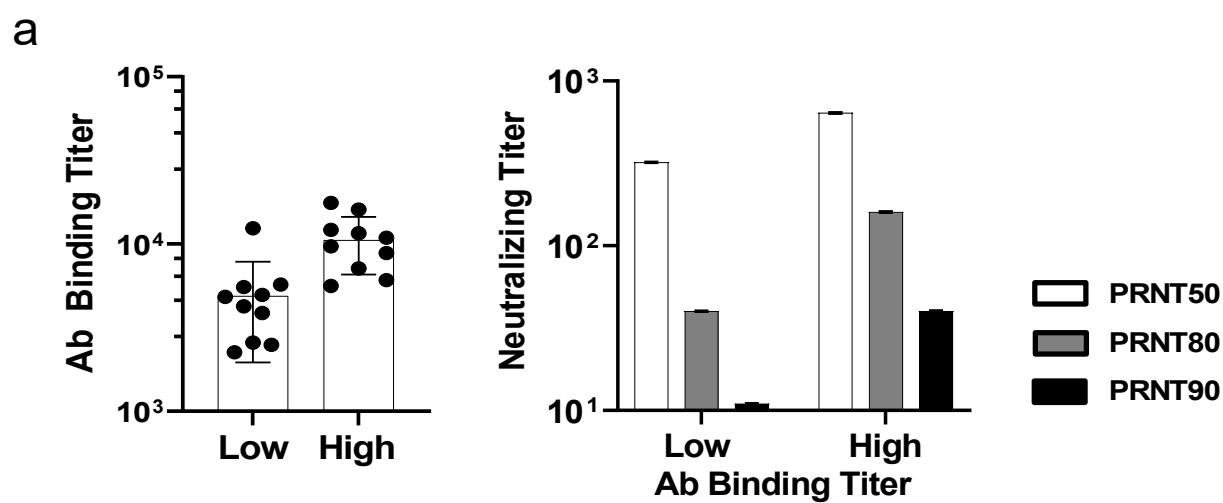

781 FIGURE 3

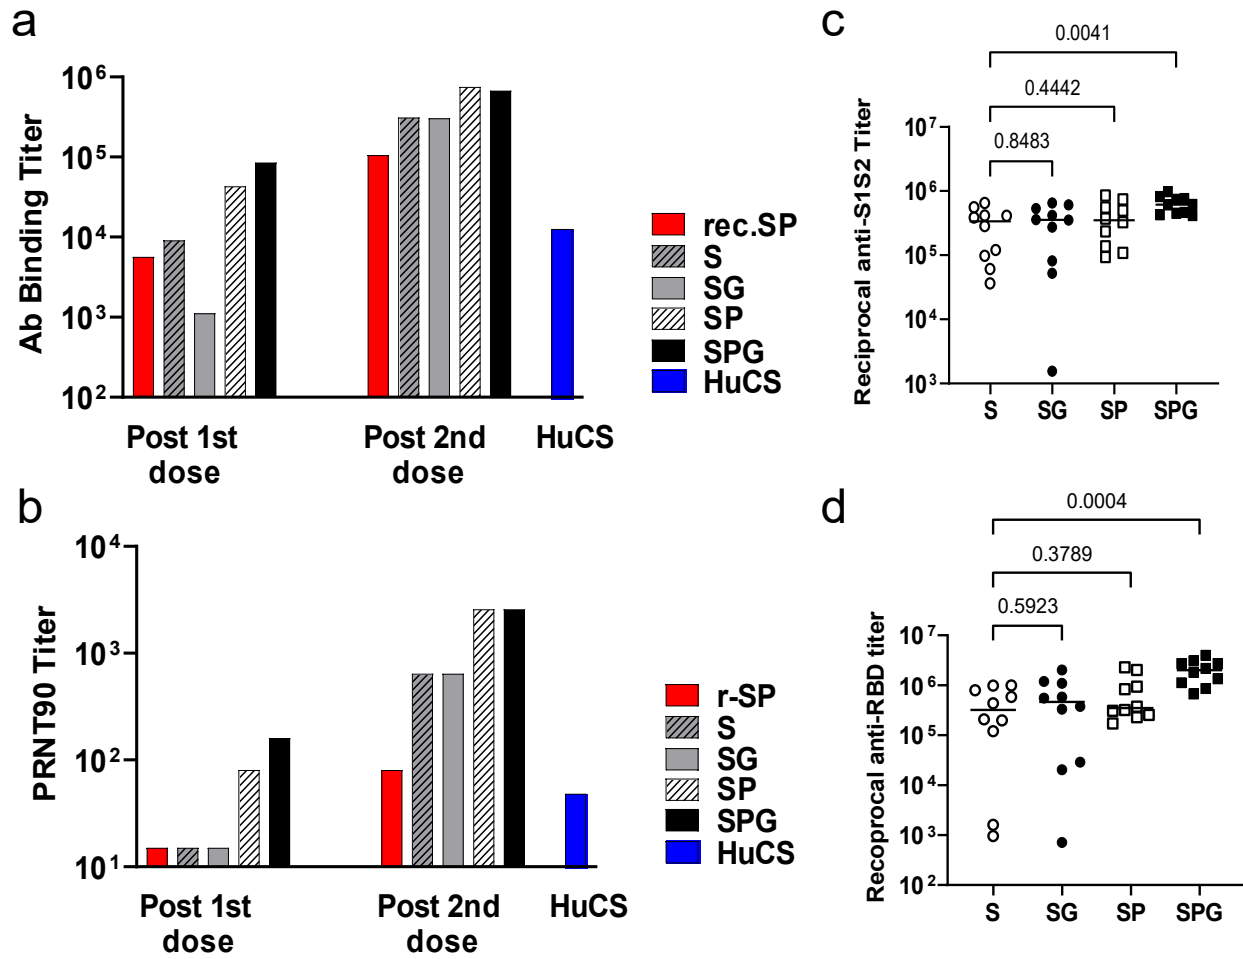

782 FIGURE 4

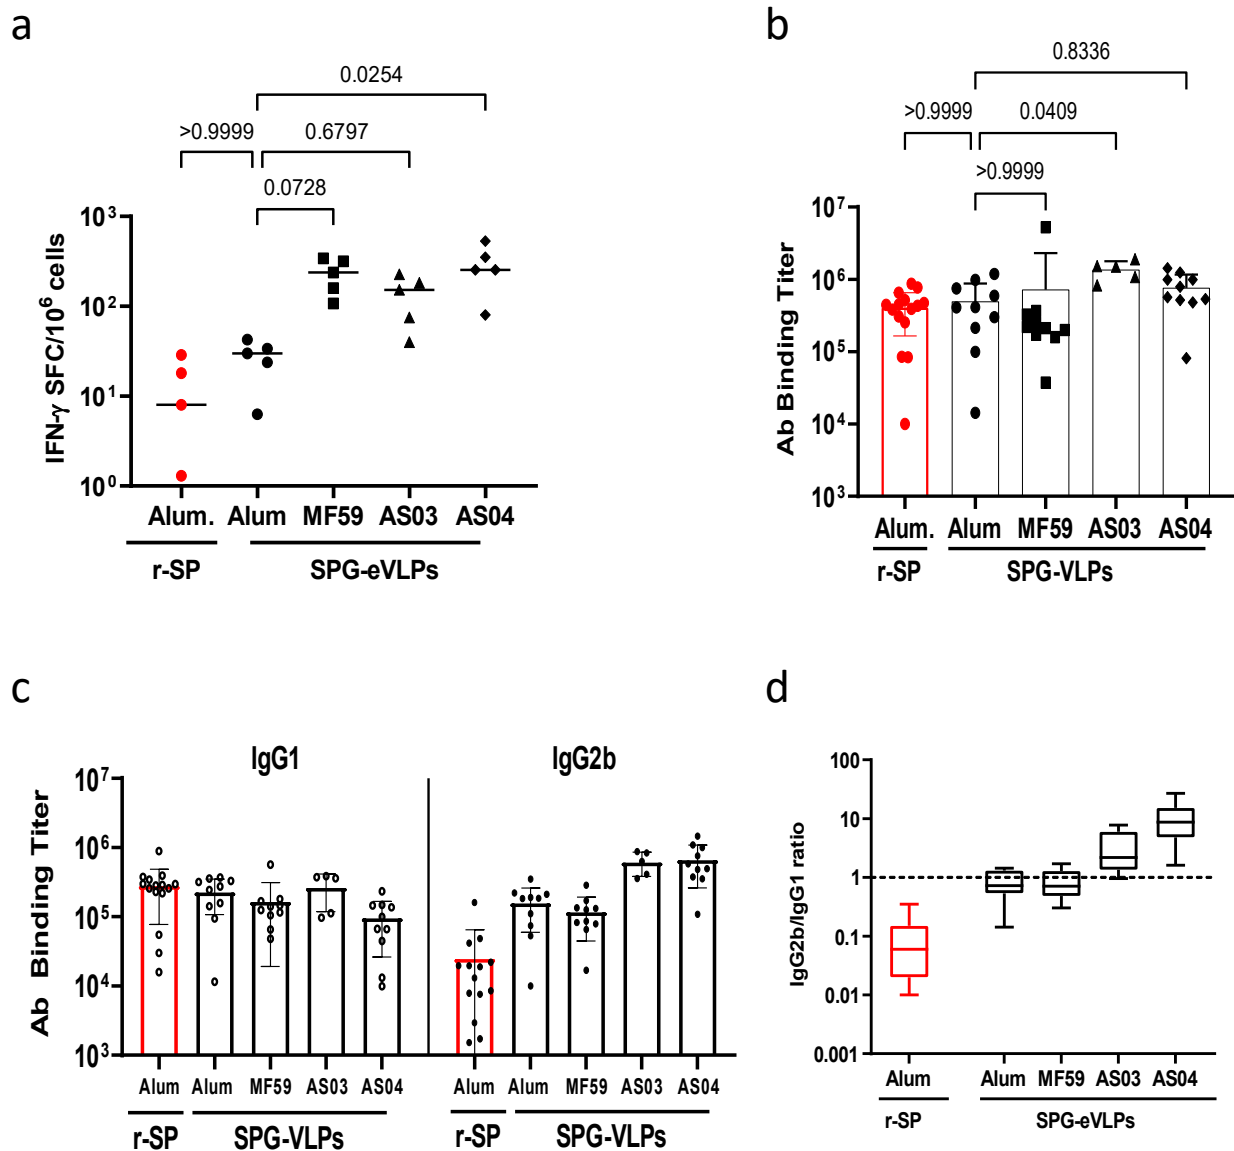

783 FIGURE 5

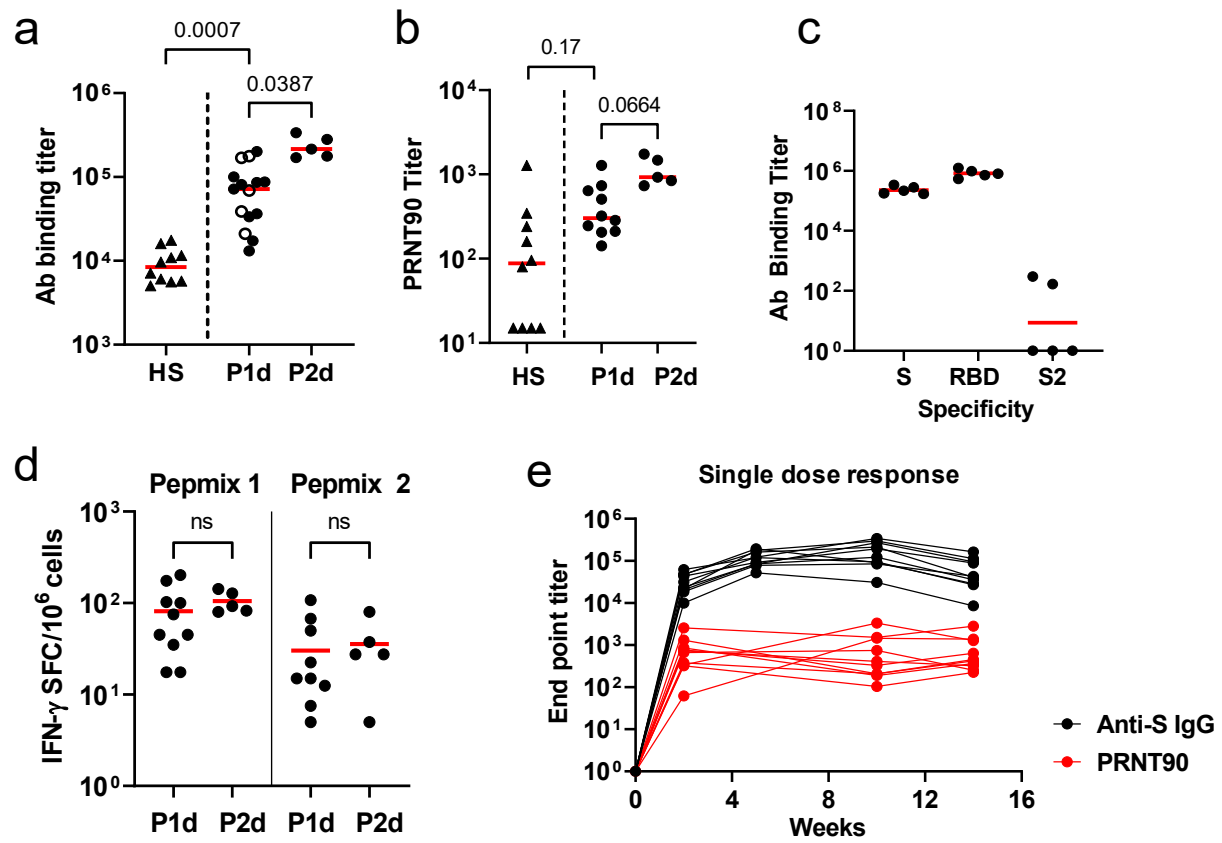

784 FIGURE 6

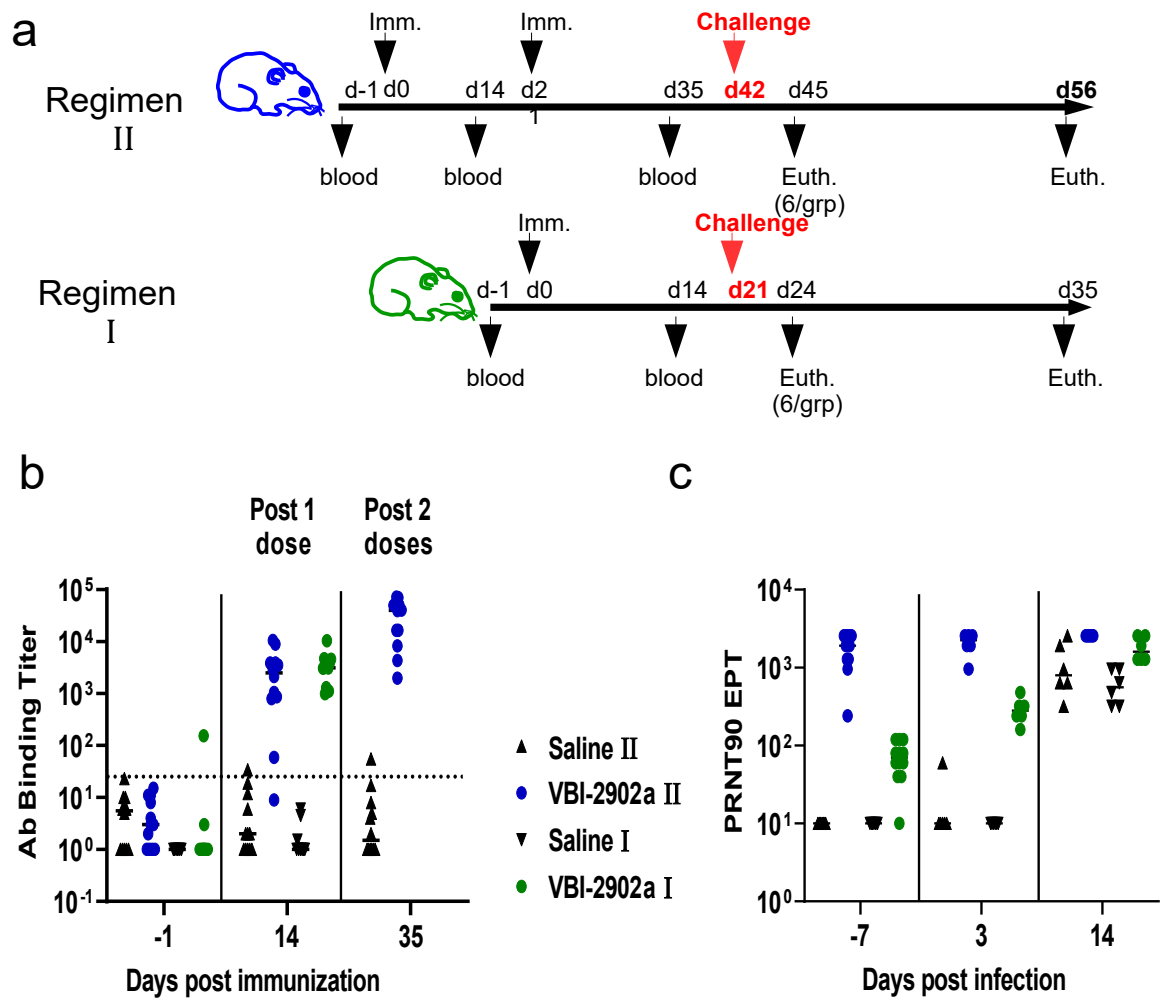

785 FIGURE 7

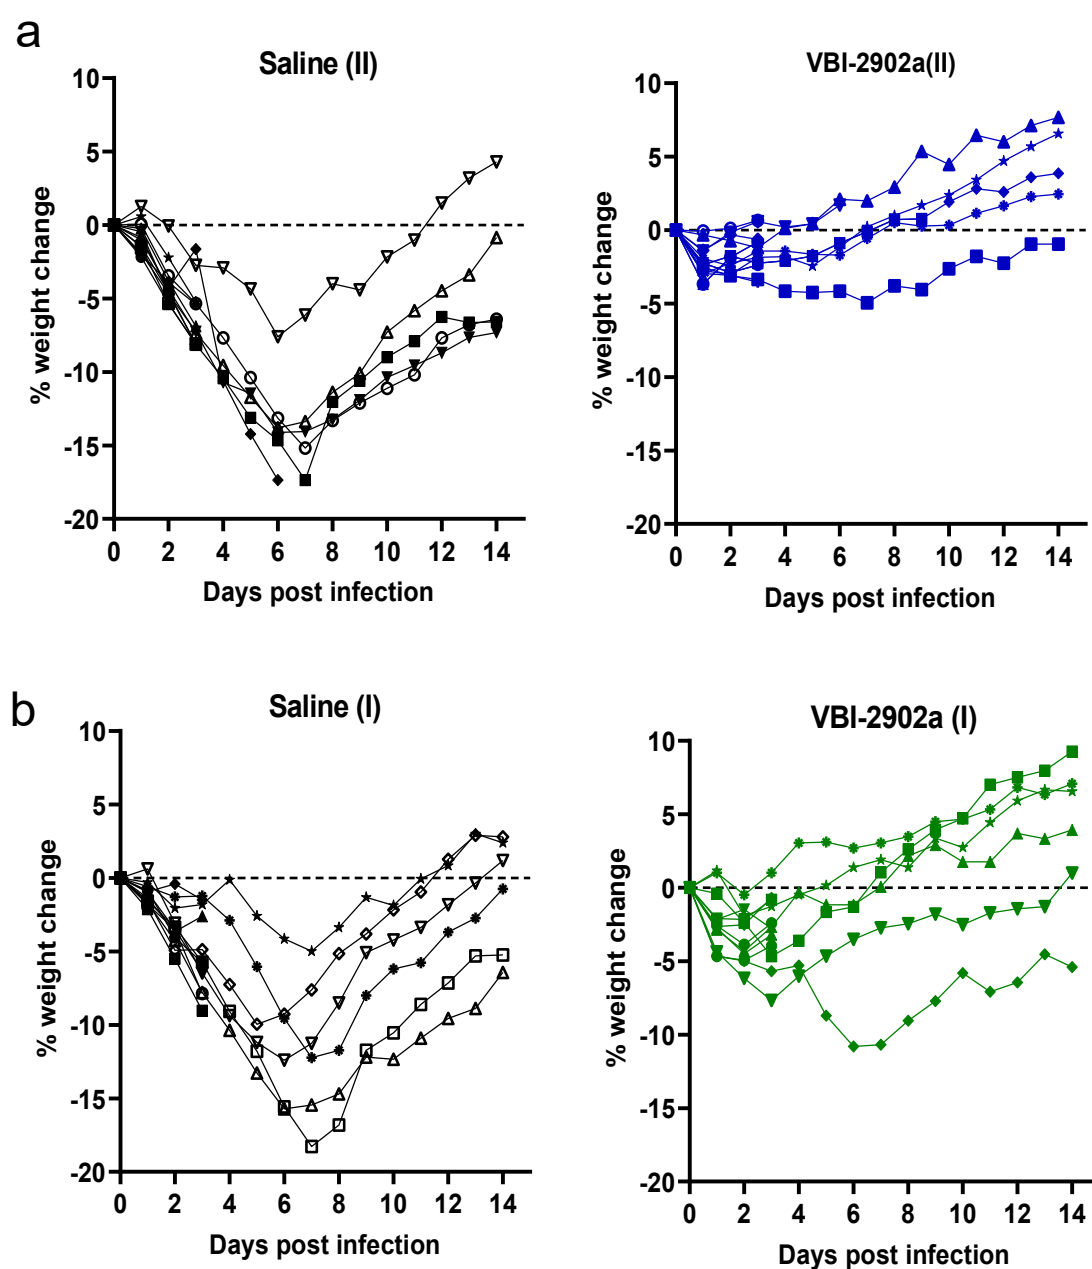



786 FIGURE 8

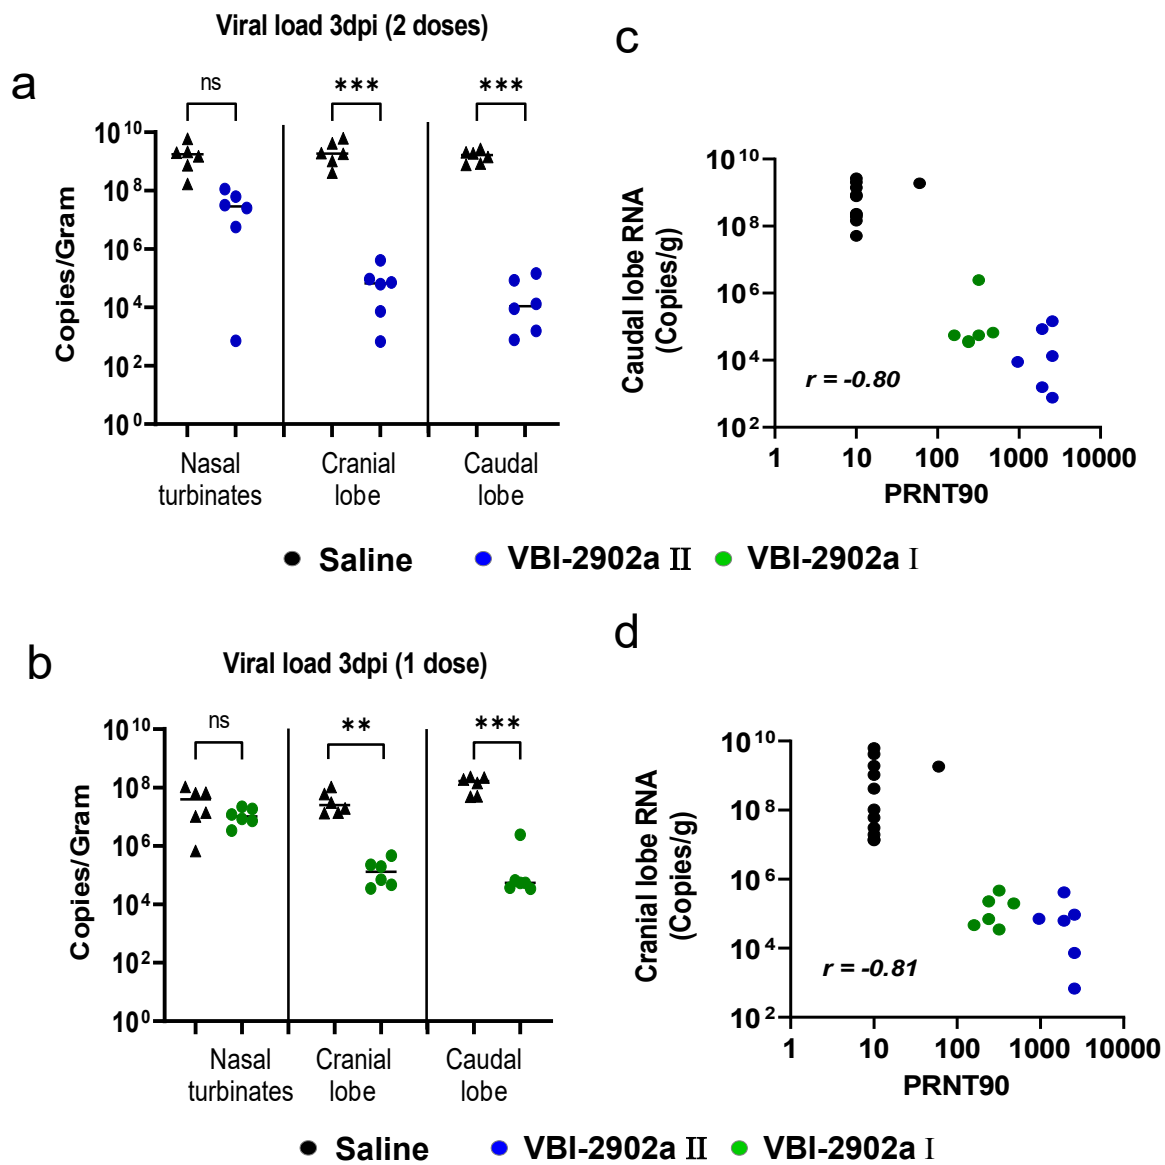

787 FIGURE 9

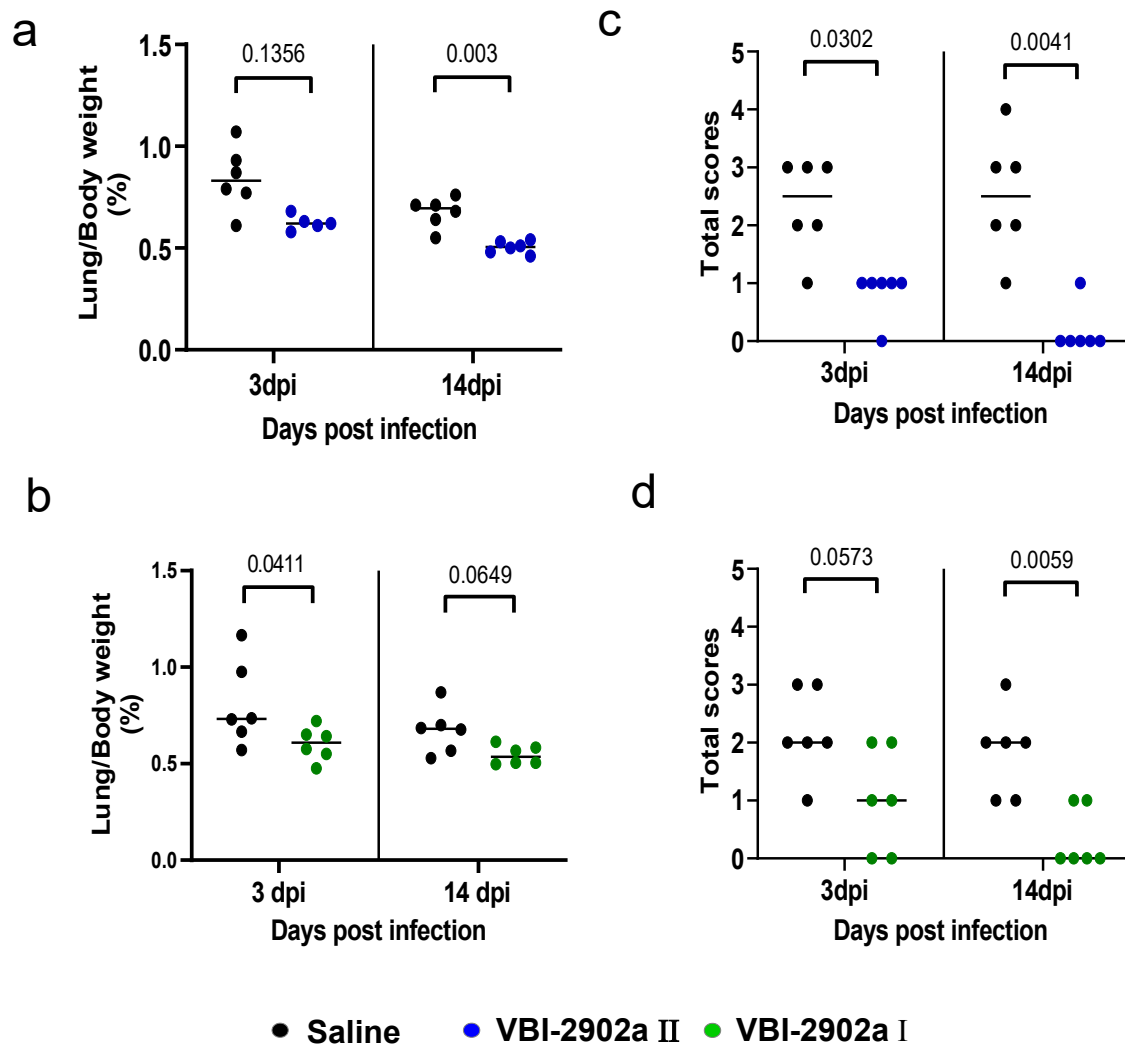

Source: http://biorxiv.org/content/10.1101/2021.04.28.441832v1.full.pdf
